# Supplementary material
Source: ML conference proceedings conference paper supplement (https://openreview.net/forum?id=91RrxhF43v)
Supplement: supplementary_material [file attachment]

## Appendix A. Appendix

### A.1. In-Context Learning Examples

#### A.1.1. MULTI-HOP LINK PREDICTION ICL EXAMPLE IN ABLATION FRAMEWORK

### Context:

Node\_47405 has relation\_179 with Node\_46497. Node\_46497 has relation\_180 with Node\_46501.  
Is Node\_47405 connected with Node\_46501?

Answer:

The answer is yes.

#### A.1.2. MULTI-HOP LINK PREDICTION ICL EXAMPLE IN KG-LLM FRAMEWORK

### Context:

Node\_47405 has relation\_179 with Node\_46497. Node\_46497 has relation\_180 with Node\_46501.  
Is Node\_47405 connected with Node\_46501?

Answer:

Node\_47405 has relation\_179 with Node\_46497, means Miles Davis music artist is associated with genre Bebop. Node\_46497 has relation\_180 with Node\_46501, means Bebop genre is under the broader genre Jazz. So Miles Davis music artist is associated with genre Jazz.

The answer is yes.

#### A.1.3. MULTI-HOP RELATION PREDICTION ICL EXAMPLE IN ABLATION FRAMEWORK

### Context:

Node\_47405 has relation\_179 with Node\_46497. Node\_46497 has relation\_180 with Node\_46501.  
What is the relationship between Node\_47405 and Node\_46501?

Answer:

The relationship between the Node\_47405 and Node\_46501 is relation\_179.

#### A.1.4. MULTI-HOP RELATION PREDICTION ICL EXAMPLE IN KG-LLM FRAMEWORK

### Context:

Node\_47405 has relation\_179 with Node\_46497. Node\_46497 has relation\_180 with Node\_46501.  
What is the relationship between Node\_47405 and Node\_46501?

Answer:

Node\_47405 has relation\_179 with Node\_46497, means Miles Davis music artist is associated with genre Bebop. Node\_46497 has relation\_180 with Node\_46501, means Bebop genre is under the broader genre Jazz. So Miles Davis music artist is associated with genre Jazz.

The relationship between Miles Davis and Jazz is music\_artist\_genre.

## A.2. Dataset 2

### A.2.1. ABLATION FRAMEWORK ONE-SHOT IN-CONTEXT LEARNING FOR MULTI-HOP LINK PREDICTION

### Context:  
node\_11809 has relation\_9 with node\_12218. node\_12218 has relation\_1 with node\_9431. Is node 11809 connected with node 9431?  
Answer:  
The answer is yes.

### A.2.2. KG-LLM FRAMEWORK ONE-SHOT IN-CONTEXT LEARNING FOR MULTI-HOP LINK PREDICTION

### Context:  
node\_11809 has relation\_9 with node\_12218. node\_12218 has relation\_1 with node\_9431. Is node 11809 connected with node 9431?  
Answer:  
node\_11809 has relation\_9 with node\_12218, means node\_11809 \_verb\_group node\_12218. node\_12218 has relation\_1 with node\_9431, means node\_12218 \_derivationally\_related\_form node\_9431. So node 11809 \_derivationally\_related\_form node 9431. The answer is yes.

### A.2.3. ABLATION FRAMEWORK ONE-SHOT IN-CONTEXT LEARNING FOR MULTI-HOP RELATION PREDICTION

### Context:  
node\_11809 has relation\_9 with node\_12218. node\_12218 has relation\_1 with node\_9431. What is the relationship between node\_11809 and node\_9431?  
Answer:  
The relationship between the first node and the last node is relation\_1.

### A.2.4. KG-LLM FRAMEWORK ONE-SHOT IN-CONTEXT LEARNING FOR MULTI-HOP RELATION PREDICTION

### Context:  
node\_11809 has relation\_9 with node\_12218. node\_12218 has relation\_1 with node\_9431. What is the relationship between node\_11809 and node\_9431?  
Answer:  
node\_11809 has relation\_9 with node\_12218, means node\_11809 \_verb\_group node\_12218. node\_12218 has relation\_1 with node\_9431, means node\_12218 \_derivationally\_related\_form node\_9431. So node 11809 \_derivationally\_related\_form node 9431. The relationship between the first node and the last node is \_derivationally\_related\_form.
